# Supplementary material for: Hyperbaric oxygen preconditioning and the role of NADPH oxidase inhibition in postischemic acute kidney injury induced in spontaneously hypertensive rats
Source: PubMed Central journal article supplement (PMC6948727; doi:10.1371/journal.pone.0226974), 2020-01-08
Supplement: pone.0226974.s001.pdf [file pone.0226974.s001.pdf]

| SHAM | AKI | AKI+APO | AKI+HBO | AKI+APO+HBO |
|------|-----|---------|---------|-------------|
| 150  | 114 | 74      | 106     | 117         |
| 135  | 91  | 109     | 110     | 110         |
| 153  | 82  | 74      | 97      | 89          |
| 130  | 119 | 83      | 99      | 73          |
| 138  | 95  | 82      | 63      | 125         |
| 125  | 119 | 98      | 131     | 93          |
| 143  | 94  | 95      | 77      | 109         |
| 113  | 119 | 90      | 106     |             |
| 111  | 114 | 65      | 76      |             |
|      | 79  | 109     | 97      |             |
|      | 98  | 127     | 123     |             |
|      |     |         | 105     |             |
|      |     |         | 110     |             |
|      |     |         | 68      |             |

| SHAM | AKI | AKI+APO | AKI+HBO | AKI+APO+HBO |     |
|------|-----|---------|---------|-------------|-----|
|      | 430 | 400     | 376     | 388         | 413 |
|      | 427 | 441     | 427     | 366         | 400 |
|      | 424 | 97      | 346     | 200         | 411 |
|      | 400 | 356     | 376     | 356         | 366 |
|      | 441 | 376     | 427     | 278         | 400 |
|      | 457 | 366     | 400     | 175         | 415 |
|      | 443 | 397     | 356     | 400         | 376 |
|      | 440 | 400     | 366     | 400         |     |
|      | 457 | 403     | 388     | 356         |     |
|      |     | 402     | 413     | 388         |     |
|      |     | 398     | 388     | 366         |     |
|      |     |         |         | 376         |     |
|      |     |         |         | 346         |     |
|      |     |         |         | 413         |     |

| SHAM | AKI  | AKI+APO | AKI+HBO | AKI+APO+HBO |      |
|------|------|---------|---------|-------------|------|
|      | 0.41 | 0.66    | 0.33    | 0.32        | 0.27 |
|      | 0.28 | 0.37    | 0.25    | 0.44        | 0.24 |
|      | 0.75 | 0.62    | 0.21    | 0.31        | 0.36 |
|      | 0.94 | 0.42    | 0.41    | 0.26        | 0.29 |
|      | 0.33 | 0.34    | 0.4     | 0.41        | 0.4  |
|      | 0.5  | 0.27    | 0.34    | 0.35        | 0.34 |
|      | 0.57 | 0.29    | 0.24    | 0.34        | 0.36 |
|      | 0.28 | 0.27    | 0.17    | 0.29        |      |
|      |      | 0.73    | 0.33    | 0.43        |      |
|      |      | 1.47    | 0.58    | 0.54        |      |
|      |      | 0.85    |         | 0.28        |      |
|      |      |         |         | 0.31        |      |

| SHAM   | AKI    | AKI+APO | AKI+HBO | AKI+APO+HBO |
|--------|--------|---------|---------|-------------|
| 499.16 | 249.84 | 332.19  | 433.33  | 483.00      |
| 647.10 | 339.13 | 457.93  | 334.38  | 525.29      |
| 260.94 | 143.00 | 555.69  | 406.25  | 492.84      |
| 204.09 | 428.21 | 395.57  | 563.33  | 470.10      |
| 400.74 | 409.68 | 441.87  | 401.10  | 412.65      |
| 385.67 | 568.97 | 431.62  | 422.58  | 410.67      |
| 372.55 | 512.50 | 400.83  | 476.67  | 498.30      |
| 547.72 | 586.67 | 741.04  | 340.00  |             |
|        | 209.38 | 421.87  | 343.33  |             |
|        | 488.87 | 266.13  | 226.67  |             |
|        | 401.30 |         | 550.00  |             |
|        |        |         | 303.45  |             |
